# Supplementary material for: Identification of Prognostic miRNAs Associated With Immune Cell Tumor Infiltration Predictive of Clinical Outcomes in Patients With Non-Small Cell Lung Cancer
Source: PubMed Central journal article supplement (PMC8281680; doi:10.3389/fonc.2021.705869), 2021-07-01

Gender

Stage

T

N

M

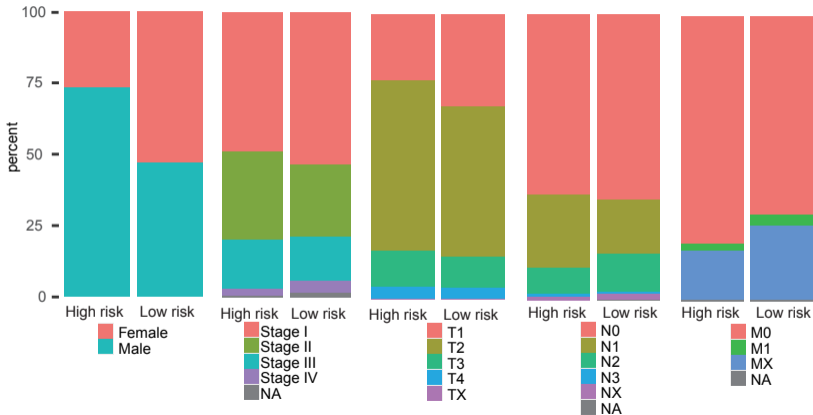

Supplement: Image_3.pdf [file Image_3.pdf]
