# Supplementary material for: Identification of Prognostic miRNAs Associated With Immune Cell Tumor Infiltration Predictive of Clinical Outcomes in Patients With Non-Small Cell Lung Cancer
Source: PubMed Central journal article supplement (PMC8281680; doi:10.3389/fonc.2021.705869), 2021-07-01

**A**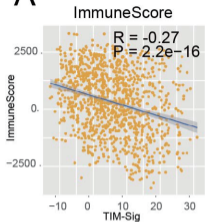**B**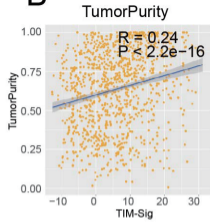**C**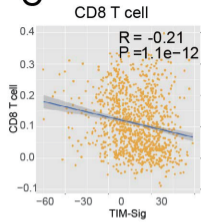**D**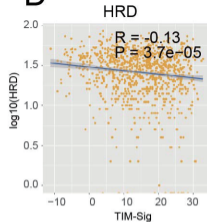**E**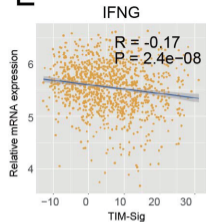**F**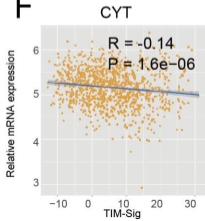**G**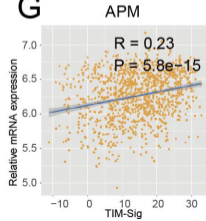**H**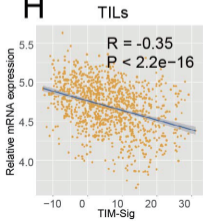**I**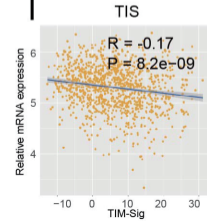**J**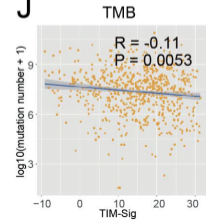

Supplement: Image_4.pdf [file Image_4.pdf]
