# Supplementary material for: Identification of Prognostic miRNAs Associated With Immune Cell Tumor Infiltration Predictive of Clinical Outcomes in Patients With Non-Small Cell Lung Cancer
Source: PubMed Central journal article supplement (PMC8281680; doi:10.3389/fonc.2021.705869), 2021-07-01
Supplement: Image_5.pdf [file Image_5.pdf]

TP53

TTN

MUC16

CSMD3

RYR2

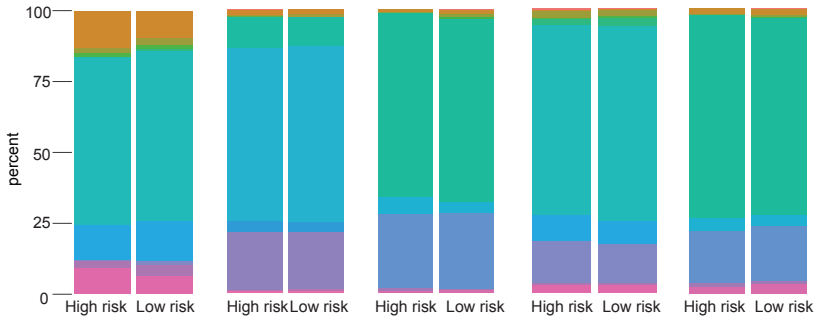

3'UTR  
 Frame\_Shift\_Del  
 Frame\_Shift\_Ins  
 In\_Frame\_Del

Missense\_Mutation  
 Nonsense\_Mutation  
 Silent  
 Splice\_Region  
 Splice\_Site  
 5'UTR

In\_Frame\_Ins  
 Intron
